# Supplementary material for: Multi-targeted management of upland game birds at the agroecosystem interface in midwestern North America
Source: PLOS journal article supplement (doi:10.1371/journal.pone.0230735), 2020-04-27
Supplement: S4 (10.1371/journal.pone.0230735.s004) [file journal.pone.0230735.s004]

**S3 Table. Pairwise  $F_{ST}$  values calculated for common pheasant in Illinois.** Samples represent wild individuals (N=686) across 14 Pheasant Habitat Areas (PHAs), plus individuals (N=543) representing three propagation stocks [J. Helfrich Manchurian (JHMA), J. Helfrich “game farm” (JHGF), and MacFarlane Manchurian (MFMA); N=143]. Estimates were derived from microsatellite DNA marker panels composed of 19 loci.  $F_{ST}$  values are below the diagonal, while  $P$ -values are above. All tabulated  $F_{ST}$  values are significantly different (\*) following Bonferroni correction ( $\alpha = 0.008$ ). Samples sizes are in Table S1.

|      | PHA    | JHGF          | JHMA          | MFMA          |
|------|--------|---------------|---------------|---------------|
| PHA  | -      | $\leq 0.0001$ | $\leq 0.0001$ | $\leq 0.0001$ |
| JHGF | 0.025* | -             | $\leq 0.0001$ | $\leq 0.0001$ |
| JHMA | 0.084* | 0.045*        | -             | $\leq 0.0001$ |
| MFMA | 0.126* | 0.084*        | 0.032*        | -             |
